1 **SnpReady for Rice (SR4R) Database**

2

3 Jun Yan<sup>1,a#</sup>, Dong Zou<sup>2,b#</sup>, Chen Li<sup>3,c</sup>, Zhang Zhang<sup>2,d</sup>, Shuhui Song<sup>2,e\*</sup>, Xiangfeng Wang<sup>1,f\*</sup>

4

5 <sup>1</sup> *Department of Crop Genomics and Bioinformatics, College of Agronomy and*  
6 *Biotechnology, China Agricultural University, Beijing 100094, China*

7 <sup>2</sup> *National Genomics Data Center & BIG Data Center & CAS Key Laboratory of Genome*  
8 *Sciences and Information, Beijing Institute of Genomics, Chinese Academy of Sciences,*  
9 *Beijing 100101, China*

10 <sup>3</sup> *Rice Research Institute, Guangdong Academy of Agricultural Sciences, Guangzhou 510640,*  
11 *China*

12

13 # Equal contribution

14 \* Correspondence should be addressed to [xwang@cau.edu.cn](mailto:xwang@cau.edu.cn) (Wang XF) and  
15 [songshh@big.ac.cn](mailto:songshh@big.ac.cn) (Song SH);

16 **Emails of authors:**

17 [hh405262448@126.com](mailto:hh405262448@126.com) (Yan J);

18 [zoud@big.ac.cn](mailto:zoud@big.ac.cn) (Zou D);

19 [lic1111@sina.com](mailto:lic1111@sina.com) (Li C);

20 [zhangzhang@big.ac.cn](mailto:zhangzhang@big.ac.cn) (Zhang Z)

21

22 <sup>a</sup> ORCID: 0000-0002-3806-6457

23 <sup>b</sup> ORCID: 0000-0002-7169-4965

24 <sup>c</sup> ORCID: 0000-0001-6702-6860

25 <sup>d</sup> ORCID: 0000-0001-6603-5060

26 <sup>e</sup> ORCID: 0000-0003-2409-8770

27 <sup>f</sup> ORCID: 0000-0002-6406-5597

28

29 Number of words: 5421

30 Number of figures: 7

31 Number of tables: 0

32 Number of supplementary figures: 4

33 Number of supplementary tables: 3

34

35 **Running title:** *Jun Yan et al. / SNP Ready for Rice database*

36

37

38

39

## 40 **Abstract**

41 The information commons for rice (IC4R) database is a collection of ~18 million SNPs  
42 (single nucleotide polymorphisms) identified by the resequencing of 5,152 rice accessions.  
43 Although IC4R offers ultra-high density rice variation map, these raw SNPs are not readily  
44 usable for the public. To satisfy different research utilizations of SNPs for population  
45 genetics, evolutionary analysis, association studies and genomic breeding in rice, the raw  
46 genotypic data of the 18 million SNPs were processed by unified bioinformatics pipelines.  
47 The outcomes were used to develop a daughter database of IC4R – SnpReady for Rice  
48 (SR4R). The SR4R presents four reference SNP panels, including 2,097,405 hapmapSNPs  
49 after data filtration and genotype imputation, 156,502 tagSNPs selected from linkage  
50 disequilibrium (LD)-based redundancy removal, 1,180 fixedSNPs selected from genes  
51 exhibiting selective sweep signatures, and 38 barcodeSNPs selected from DNA fingerprinting  
52 simulation. SR4R thus offers a highly efficient rice variation map that combines reduced SNP  
53 redundancy with extensive data describing the genetic diversity of rice populations. In  
54 addition, SR4R provides rice researchers with a web-interface that enables them to browse all  
55 four SNP panels, use online toolkits, and retrieve the original data and scripts for a variety of  
56 population genetics analyses on local computers. The SR4R is freely available to academic  
57 users at <http://sr4r.ic4r.org/>.

58

59 **Keywords:** Rice; SNP; Database; Hapmap

60

## 61 **Introduction**

62 *Oryza sativa*, or rice, was the first crop genome to be sequenced. In the past decade,  
63 thousands of rice accessions in the germplasm banks worldwide have been genotyped [1] and  
64 numerous rice variation databases have been constructed. One of these databases is the rice  
65 variation database (RVD), a daughter database of the Information Commons for Rice  
66 consortium (IC4R) [2]. RVD is a collection of over eighteen million SNPs (single nucleotide  
67 polymorphisms) identified from 5,152 rice accessions based on whole-genome resequencing  
68 data, and offers an ultra-high-density rice variation map – about one SNP per twenty bases on  
69 average. The information contained in this high volume of raw SNPs is not ready for use until

70 it has been processed to remove low-quality SNPs, such as those with missing/low frequency  
71 genotypes, or redundant SNPs identified due to linkage disequilibrium (LD). In addition,  
72 different types of research require different magnitudes of SNPs to ensure efficient  
73 computing and accurate results; for example, the requirements are different for evolutionary  
74 studies using comparative genomics and pan-genome analysis, gene mapping by quantitative  
75 trait loci (QTL), genome-wide association study analysis (GWAS), molecular breeding by  
76 marker-assisted selection (MAS) and genomic selection (GS), and variety protection by DNA  
77 fingerprint barcoding.

78 Construction of a reference haplotype map (HapMap) to represent the maximal population  
79 diversity for a species is the first step. The ~18 million raw SNPs in RVD provide an initial  
80 variation dataset to generate a reference HapMap for rice. According to international human  
81 HapMap database, which contains over 3.1 million high-quality SNPs, a density of one SNP  
82 per 100 bases is sufficient for performing genotype imputation, GWAS analysis and mapping  
83 of causal variations [3]. Because the genome size of rice is ~ 400 Mbp, about two million  
84 high-quality SNPs may offer an ideal density of one SNP per 200 bases. Such density of a  
85 reference rice HapMap is especially useful for molecular breeders to perform genotype  
86 imputation to supplement missing genotypes or increase SNP density, as low-density  
87 genotyping platforms are mostly used in rice to lower genotyping expense.

88 For population genetics studies in which thousands of individual samples are assessed, the  
89 millions of SNPs in an entire HapMap are excessive. The redundant SNPs in a HapMap  
90 extensively increase computing costs, and may also reduce the accuracy of results. To  
91 circumvent these challenges, a subgroup of SNPs whose genotypes significantly correlate  
92 with other SNPs in the same linkage disequilibrium (LD) region are selected; these are  
93 known as tagging SNPs. The number of tagging SNPs may vary between species and  
94 populations, depending upon the lengths of LD regions in each group [4]. Based on the data  
95 in RVD, LD length in rice ranges from 100 to 500 Kb; thus 100,000 SNPs, which yields a  
96 density of one tagging SNP per 3 to 5 Kbp, is sufficient for various genetic diversity analysis.

97 The expense of genotyping is an important factor to consider in crop molecular breeding,  
98 as molecular breeding typically requires the rapid genotyping of thousands of samples, often  
99 within days or even hours. Therefore, low SNP density genotyping technologies, such as SNP  
100 chip or KASP-based platforms are usually preferred by industrial seed companies; these  
101 methods offer great flexibility by combining the rapid identification of low numbers of SNPs

102 (several to a few dozen) with the ability to multiplex hundreds to thousands of DNA samples.  
103 However, these methods lack precision.

104 Modern breeding methods demand the efficiency and stability of a highly concise marker  
105 panel containing ~1K SNPs. SNPs used to select plants for breeding typically occur in genes  
106 or genomic regions that are associated with agronomic traits believed to be subject to  
107 selective pressures [5]. Genes with variations exhibiting selectively fixed signatures can be  
108 identified based on the  $\theta\pi$  and *Fst* values computed by selective sweep analysis [6]. This  
109 magnitude of SNPs is suitable for synthesis on low-density SNP chips, which are then used  
110 for conducting certain types of molecular analysis, such as marker-assisted selection, seed  
111 purity or heterozygosity testing, genetic component analysis, and subpopulation classification.  
112 For intellectual protection of commercial rice varieties, DNA fingerprinting typically uses  
113 only 12 to 36 SNPs, to generate a combination of barcodes with maximal resolution to  
114 distinguish commercial varieties in the seed industry or germplasm accessions in gene banks.  
115 Simulation of all possible combinations of a set of candidate SNPs have to be tested in a large  
116 germplasm population to ensure the maximal resolution with fewest markers, such as the  
117 MinimalMarker algorithm [7].

118 To enhance the ability of researchers to effectively use the RVD in IC4R, we developed a  
119 daughter database we have called SnpReady for Rice, or SR4R. SR4R enables researcher to  
120 readily retrieve SNPs that are relevant to their own research, thus saving time and  
121 computational resources. In SR4R, the ~18 million SNPs have been divided into four  
122 categories: hapmapSNPs, tagSNPs, fixedSNPs, and barcodeSNPs (**Figure 1**). SR4R allows  
123 users to browse the related information associated with each SNP panel, and also to  
124 download each set of genotype files for local use. SR4R also offers 18 bioinformatics tools  
125 and pipeline scripts, enabling users to locally run the tools to perform genotype imputation,  
126 basic statistical analysis, genotype file format conversion, SNPs filtration and extraction,  
127 population structure analysis, genetic diversity analysis, rice subpopulation classification,  
128 DNA fingerprinting analysis, and other additional functions.

129

## 130 **Database contents and analytical modules**

### 131 **The hapmapSNP panel**

132 The IC4R rice variation database (RVD; <http://variation.ic4r.org/>) is a collection of over 18  
133 million SNPs with related annotation information, identified from previously published  
134 whole genome resequencing of 5,152 rice accessions [2]. Such a high-density rice variation  
135 map, which identifies an average of one SNP per twenty bases, offers the possibility of  
136 generating a high-density HapMap for the rice research community; creating such a HapMap  
137 was the first step in creating the SnpReady for Rice (SR4R) Database described here.

138 To ensure the quality of HapMap, we performed an initial filtration of samples and SNPs  
139 on the raw dataset of 5,152 accessions (**Materials and Methods**). First, a total of 2,556  
140 accessions with genotype missing rate less than 20% were selected; each selected accession  
141 has been documented with explicit subpopulation classification and origins (**Table S1**). Then,  
142 SNPs with genotype missing rate  $\geq 0.1$  and minor allele frequency (MAF)  $\leq 0.05$  were  
143 removed. Genotype imputation on the resulting 2,883,623 SNPs in the selected 2,556  
144 accessions yielded a high-quality HapMap containing 2,097,405 SNPs without any missing  
145 genotypes using the software Beagle [8]. These 2,097,405 SNPs were regarded as the  
146 hapmapSNP panel, and were used as the initial dataset for generating the other three SNP  
147 panels (**Figure 2A and 2D**).

148 The generated reference HapMap of rice has an average density of five SNPs per Kb with  
149 a heterozygosity rate of 3.75% (**Figure 2B and 2D**). Genome-wide distribution statistics  
150 showed that 58.4% of the hapmapSNPs present in the intergenic regions, 12.5% in the  
151 intronic regions, 11.8% in the exonic regions, 0.02% on the splicing sites, and 10.6% and  
152 6.8% hapmapSNPs located in the upstream and downstream regions (1Kb away from  
153 transcription start site or transcription end site) of a gene territory (**Figure 2F**). The 2,097,405  
154 hapmapSNPs with genotypes of 2,556 accessions are available to download, enabling users to  
155 perform genotype imputation on local genotype data to increase the density of SNPs  
156 generated from low-density genotyping platform.

157

### 158 **The tagSNP panel**

159 High SNP density is usually beneficial to precise mapping of trait-related genes with GWAS  
160 analysis, but is not suitable for population genetic analysis because SNP redundancy may add  
161 unnecessary computation costs and introduce bias to the results [9]. Since SNPs within the  
162 same LD region possess correlated genotypes forming one haplotype block, a representative

163 SNP is usually selected as a tag to solve the redundancy issue. We adopted an LD-based SNP  
164 pruning procedure to infer haplotype tagging SNPs (tagSNPs) from the hapmapSNPs  
165 (**Materials and Methods**). As a result, 156,502 tagSNPs were identified (**Figure 1**). To  
166 verify whether the tagSNP panel properly represents the genetic diversity of the population,  
167 phylogenetic analysis using the 156,502 tagSNPs was performed on the 2,556 rice accessions  
168 which were explicitly documented with subpopulation classification and origins. As shown in  
169 **Figure 3A**, the resulting phylogenetic tree clearly exhibited six major clades representing the  
170 five cultivated rice subpopulations and one wild rice subpopulation. The five cultivated rice  
171 subpopulations include *indica* rice (*Ind* for short) containing 1,655 accessions, *Aus* rice (*Aus*)  
172 containing 182 accessions, *Aromatic* (*Aro*) rice containing 56 accessions, tropical *japonica*  
173 rice (*TrJ*) containing 318 accessions, and temperate *japonica* rice (*Tej*) containing 327  
174 accessions, whilst the wild rice subpopulation contains 18 *O. rufipogon* (*Oru*) accessions. In  
175 addition, PCA-based (**Figure 3B**) and admixture-based (**Figure 3C**) analyses showed the  
176 same pattern, with the subpopulation classification as the phylogenetic tree indicated. For  
177 population admixture structure analysis, a predefined parameter of “K value” was used to  
178 mandatorily estimate the number of ancestral subpopulation and uses different colours for  
179 each K value to represent the number of subpopulations. Because the optimal number of  
180 ancestral subpopulation is usually unknown, a common way is to use a series of K value to  
181 estimate the optimal K parameter. It is worth noting that the *japonica*, *indica* and *Aus*  
182 subpopulations were explicitly separated when K was set to 3, while the six subpopulations  
183 were clearly separated until the K value was set to 8. In addition, between K=4 to 7, the  
184 *indica* subpopulation showed clear structure divided into six groups (*indica* g1 to g6) as  
185 indicated by both PCA and admixture analysis (**Figure 3D and Figure S1**). The genetic  
186 structures of the six rice subpopulations and the six *indica* subgroups are consistent with  
187 multiple previous reports [10].

188

### 189 **Genetic diversity analysis with the tagSNP panel**

190 The tagSNP panel represents a subset of the hapmapSNPs after approximately 92.5% of the  
191 genetic redundancy was removed (**Figure 1**). To test the effectiveness of the 156,502  
192 tagSNPs, we performed another series of standard genetic diversity analyses and examined  
193 whether the results agreed with previously reported conclusions. First, we found that the  
194 count of homozygous SNPs and the heterozygosity rate of the accessions in the six

195 subpopulations showed opposite trends: while the accessions in the *TeJ* subpopulation had  
196 the highest count of homozygous SNPs and lowest heterozygous rate, the accessions in the  
197 *indica* subpopulation had the lowest count of homozygosity SNPs and highest homozygosity  
198 rate (**Figure 4A and 4B**). The IBS (identity by state) analysis is a commonly used method to  
199 measure the similarity of alleles in a designated population, which may reflect the genetic  
200 diversity of the whole population and subpopulations. Comparison of the IBS values among  
201 different subpopulations may help understand the degree of genetic differentiation in  
202 different subpopulations. In order to validate whether the IBS results generated from the  
203 tagSNPs are consistent with the previous reports regarding the genetic diversity in different  
204 subpopulations, pairwise computation of the IBS values between each pair of accessions  
205 within the same subpopulation was performed, and the results showed that temperate  
206 *japonica* rice has the highest IBS values, while the *indica* rice has the lowest (**Figure 4C**). In  
207 addition, runs of homozygosity (ROH) analysis indicated that the temperate *japonica* rice has  
208 the most and longest ROH regions, while the *indica* rice has the least and shortest ROH  
209 regions (**Figure 4D**). This pattern agreed with the result from LD decay analysis showing that  
210 temperate *japonica* rice has the slowest LD decay rate while the *indica* rice has fastest rate  
211 (**Figure 4E**). Computations of  $\theta\pi$  and  $F_{st}$  are commonly used methods to measure genetic  
212 diversity within population and between population, respectively (**Materials and Methods**).  
213 The within-subpopulation diversities of the six rice subpopulations are *Oru* ( $\theta\pi=0.218$ ), *Ind*  
214 ( $\theta\pi=0.216$ ), *Aus* ( $\theta\pi=0.182$ ), *Aro* ( $\theta\pi=0.145$ ), *TrJ* ( $\theta\pi=0.116$ ) and *TeJ* ( $\theta\pi=0.068$ ). Using the  
215 wild rice subpopulation as reference, the genetic distances of the five types of cultivated rice  
216 between wild rice are *TeJ* ( $F_{st}=0.476$ ), *TrJ* ( $F_{st}=0.419$ ), *Aus* ( $F_{st}=0.299$ ), *Ind* ( $F_{st}=0.266$ )  
217 and *Aro* ( $F_{st}=0.241$ ), suggesting the highest domestication level of *japonica* rice compared to  
218 other rice (**Figure 4F and 4G**). The collective results from multiple angles of standard  
219 genetic diversity analyses were consistent with previous reports that *indica* rice has a more  
220 complicated genetic composition and origin compared to the other five subpopulations [11].

221

## 222 **Genomic selection analysis with the tagSNP panel**

223 Genomic selection (GS) has been widely used in industrial animal and crop breeding  
224 programs [12]. GS is essentially a best linear unbiased prediction (BLUP) model that is first  
225 trained with known genotypes and phenotypes of reference population individuals, usually  
226 accounting for 20% to 50% of a breeding population, and then used to predict the unknown



227 phenotypes of the remaining genotyped individuals (the candidate population). The predicted  
228 phenotypes, known as the genomic estimated breeding values (GEBV), are ranked from high  
229 to low, and can be used to assist in deciding upon a hybridization plan. Although GS may  
230 significantly shorten the breeding cycle, the cost for genotyping has been a vital factor  
231 because the GS model has to take genome-wide SNP markers as input, especially from crop  
232 breeding in which thousands to hundreds of thousands of individuals need to be genotyped.  
233 In order to lower genotyping cost, compilation of a set of thousands of SNPs that may best  
234 represent the overall genetic backgrounds of a breeding population is of great importance.

235 Because the 156,502 tagSNPs category is a high-quality marker set with most redundancy  
236 removed while preserving maximal genetic diversity, it may be considered as a marker pool  
237 for selecting high-efficiency SNPs for genomic selection. To test the effectiveness, we  
238 analysed a previously published dataset containing 414 rice parental lines with non-missing  
239 genotypes of 29,434 SNPs profiled by the 44K rice SNP chip, and nine phenotype traits  
240 (flowering time, panicle fertility, seed width, seed volume, seed surface area, plant height,  
241 flag leaf length, flag leaf width, and florets per panicle). The GS model was obtained from  
242 the ridge regression best linear unbiased prediction (rrBLUP) algorithm [13], and prediction  
243 accuracy was evaluated with Pearson correlation between observed and predicted traits by  
244 five-fold cross validation. The evaluation was performed using five different SNP  
245 combinations: Set-1, the original 29,434 SNPs on the 44K chip; Set-2, the 1,090 SNPs  
246 overlapped between the 156,502 tagSNPs and 29,434 SNPs; Set-3, the 1,090 SNPs randomly  
247 selected from the 29,434 SNPs; Set-4, the 1,090 SNPs evenly distributed in the genome (350  
248 Kb per SNP) selected from the 29,434 SNPs; and Set-5, the 1,090 consecutive SNPs  
249 localized within a randomly selected genomic region from the 29,434 SNPs. Then the  
250 rrBLUP prediction was performed on the nine phenotypes using the five sets of SNPs to  
251 compare prediction accuracies (**Figure 5**). Although prediction accuracies greatly varied  
252 ranging from 0.23 to 0.90 among the nine traits due to different heritability of each trait, the  
253 trend of the five SNP sets within the same trait was generally consistent. Except for the trait  
254 of panicle fertility in which the Set-2 SNPs exhibited the highest prediction accuracy, the full  
255 29,434 SNPs showed the highest prediction accuracy for the other eight traits followed by the  
256 1,090 tagSNPs in the second position. We further performed pairwise student's t-test for  
257 Pearson correlations of the selected 1,090 tagSNPs set (Set-2) and other four sets, the result  
258 shows that the selected 1,090 tagSNPs set significantly outperform other randomly selected  
259 SNP set for most traits (**Figure S2**). These results indicate that selection of about one

260 thousand tagSNPs from the tagSNP pool might be a feasible option to lower genotyping  
261 budget; for example, these SNPs could inform the synthesis of a new low-density SNP chip  
262 rather than using high-density SNP chip.

263

#### 264 **The fixedSNP panel**

265 In the crop breeding industry, genotyping cost-per-sample is a top-priority factor, since  
266 hundreds to thousands of samples are often genotyped in single day. The data then assists a  
267 variety of molecular breeding practices, including genomic selection-assisted phenotype  
268 prediction, marker-assisted backcrossing, seed purity or genotype heterozygosity analysis,  
269 and subpopulation identification. Cost reduction is usually fulfilled by compiling a highly  
270 effective marker panel containing only dozens to hundreds of SNPs that are available for  
271 high-throughput genotyping platforms, such as Douglas ArrayTape and LGC Omega-F  
272 equipment, using a PCR-based KASP<sup>TM</sup> genotyping assay. These systems allow users to  
273 flexibly combine different numbers of SNPs and DNA samples using multiple plates with 96  
274 and 384 wells per run. To meet the industrial demand, further compression of the tagSNP  
275 panel must consider not only the genetic relationship between subpopulations and accessions,  
276 but also the evolutionary and/or functional significance of SNPs with high diagnostic  
277 effectiveness and stability.

278 The  $F_{st}$  and  $\theta\pi$  values are commonly used indicators of genomic regions demonstrating  
279 signatures of selective sweeps, caused by domestications, artificial selections and  
280 environmental adaption. SNPs in selective-sweep regions are usually evolutionarily fixed  
281 with strong positive selection signals. To generate the fixedSNP panel, we first identified the  
282 selective sweep regions that are specific to each subpopulation and are common to the six  
283 subpopulations by combining the ratio of  $F_{st}$  versus  $\theta\pi$  based on the comparison of the  
284 cultivated subpopulation against the wild rice population (**Materials and Methods**). Using  
285 100 Kb and 10 Kb windows, large and small genomic regions showing selective sweep  
286 signals were identified, respectively. In total, 227 (cultivated vs. wild), 381 (*Ind* vs. wild), 333  
287 (*Aus* vs. wild), 296 (*Aro* vs. wild), 256 (*TrJ* vs. wild) and 269 (*TeJ* vs. wild) identified regions  
288 showed significantly smaller *Tajima'* D values compared to other regions (**Figure 6A**).  
289 Subsequently, genes located in the selective sweep regions and their corresponding GSEA  
290 (Gene Set Enrichment Analysis) terms were further identified for each subpopulation, and  
291 ~50% of them were specific to each subpopulation whilst only 27 GSEA terms co-exist in the

292 five cultivated rice subpopulations (**Figure 6B**). Finally, a total of 1,180 SNPs occurred  
293 within the genes in the selective sweep regions were selected to generate the fixedSNP panel.

294

### 295 **Subpopulation classification analysis with the fixedSNP panel**

296 To evaluate the fixedSNP panel, subpopulation classification with phylogenetic tree analysis  
297 was performed using the 1,180 fixedSNPs, and the results were compared to the results  
298 generated from the 156,502 tagSNPs performed on the same population of 2,556 accessions.  
299 All of the accessions were assigned to the correct subpopulations with tagSNPs and the  
300 phylogenetic tree showed consistent structure with the tree constructed with fixedSNPs  
301 (**Figure 6C**). To further evaluate the universality of the fixedSNP panel, we performed  
302 subpopulation classification on two external populations genotyped by SNP chips [11] [14].  
303 One chip dataset contained 880 cultivated rice accessions genotyped by the Affymetrix 700K  
304 SNP chip, while the other contained 351 cultivated accessions genotyped by the Illumina 44K  
305 SNP chip. Both external chip datasets have been documented with clear subpopulation  
306 classification and origins, and possess relatively high genetic diversity. Only 314 and 63  
307 SNPs from the 700K and 44K chips, respectively, were found in the 1,180 fixedSNP panel.  
308 For the chip dataset containing 880 accessions, 877 accessions were correctly assigned to  
309 their documented subpopulations; three *TeJ* accessions (IRGC121549, IRGC121520 and  
310 IRGC121535) were incorrectly assigned to the *TrJ* subpopulation (**Figure 6D**). As for chip  
311 dataset containing 351 accessions, 348 were assigned to the correct subpopulation; three *TeJ*  
312 accessions (NSFTV134, NSFTV204 and NSFTV283) were mistakenly assigned to *Trj* rice  
313 (**Figure 6E**). Overall, 99.8% of the rice accessions examined were assigned to previously  
314 documented subpopulation records using markers extracted from the fixedSNP panel,  
315 indicating that the fixedSNP panel is an efficient, accurate new tool for subpopulation  
316 classification.

317

### 318 **The barcodeSNP panel**

319 DNA fingerprinting technology using a small set of SNPs to generate a series of genotype  
320 combinations, referred to as “barcodes,” has become an economical means to protect  
321 commercialized varieties. Thus, the barcodeSNP panel must be able to uniquely identify  
322 these barcodes to distinguish between each of the rice varieties on the market. To ensure

323 highest uniqueness but lowest count of barcodeSNPs, we applied the MinimalMarker  
324 algorithm on the fixedSNP panel to exhaustively traverse all possible genotype combinations  
325 that would distinguish the 2,556 accessions (**Materials and Methods**). The MinimalMarker  
326 algorithm generate three sets of minimum marker combinations, in which each set contains  
327 28 SNPs. After merging the three sets, 38 barcodeSNPs were finally selected to generate the  
328 panel (**Figure S2A**). In addition, up- and down-stream flanking sequences were also provided  
329 for users to design primers for PCR-based KASP<sup>™</sup> genotyping assays. The SR4R also offers  
330 a web interface that allows users to identify corresponding accessions or varieties when rice  
331 varieties are submitted for genotyping with any number of barcodeSNPs between 8 to 38.  
332 The SR4R returns a list of the top 10 best-matched accessions/variety in the database, and  
333 displays associated information including the accession/variety IDs, number of mismatched  
334 bases, genomic position of the barcode, genotype heterozygosity, and documented  
335 subpopulation and origin. Among the top 10 hits, if multiple best-matched varieties with  
336 100% identity are returned using a certain number of barcodes, the users may genotype  
337 additional barcodeSNPs until a unique best matched variety is identified. It is worth noting  
338 that because the SR4R does not have a complete list of the barcodes for all commercial rice  
339 varieties in the database, the 38 barcodeSNPs is considered as an initial panel for users to test  
340 the best combinations with the most optimal sensitivity and specificity using flexible numbers  
341 of markers.

342

### 343 **Machine learning analysis with the barcodeSNP panel**

344 If a new variety genotyped with barcodeSNPs is not found in the database, SR4R will  
345 perform subpopulation classification. The traditional method of subpopulation classification  
346 first integrates the genotype of the submitted variety with the genotypes of all the varieties in  
347 the database, then performs phylogenetic analyses to determine the best assigned  
348 subpopulation. This procedure is tedious and computationally inefficient since the database  
349 contains hundreds of thousands of accessions. To simplify the procedure so that it may be  
350 implemented through a web interface, we adopted an alternative method that utilizes machine  
351 learning-based subpopulation classification models with the 38 barcodeSNPs as features. We  
352 used all of the 2,556 rice accessions to evaluated seven commonly used machine learning  
353 algorithms to perform subpopulation classification including decision tree, k-nearest  
354 neighbouring, naïve Bayesian, artificial neural network, random forest, multinomial logistic

355 regression and one-*vs*-rest logistic regression algorithms, followed by ten-fold cross  
356 validation assessment (**Materials and Methods**). A series of assessments of the classification  
357 precision in the five cultivated rice subpopulations indicated that, out of the seven methods  
358 the best one is the multinomial logistic regression model, whose AUC (Area under curve)  
359 values were all  $\geq 0.99$  for all subpopulations (**Figure S3B-F**). Additional methods are one-*vs*-  
360 rest logistic regression and the random forest model; where results from each yielded similar  
361 classification precision to the multinomial logistic regression model. Then, we used an  
362 independent datasets containing 880 rice accessions profiled by 770 Kb rice SNP chip for  
363 independent validation. The multinomial logistic regression model was trained by the 2,556  
364 rice accessions, and then predict the subpopulation classifications on the 880 samples. The  
365 AUC values were all  $\geq 0.99$  for all subpopulations in this independent datasets, indicating  
366 robustness of the model. Moreover, compared the original label and the predicted label with  
367 the max probability for each sample, the true positive rate (TPR) and false positive rate (FPR)  
368 are also reasonable (**Figure S4**). The pre-trained classification models with the seven  
369 machine learning algorithms have been implemented on the SR4R server provided as a web  
370 tool for users to perform subpopulation classification when the genotype information of the  
371 38 barcodeSNPs in submitted.

372

### 373 **The barcodeInDel panel**

374 InDel (Insertion and Deletion) is another form of genomic variations (usually less than 50 bp  
375 in length) that can be used as molecular markers for a variety of population analysis. From  
376 the 5,152 rice accessions, a total of 4,217,174 raw InDel variations were identified using the  
377 IC4R variation calling pipeline [2]. After filtering low-quality InDels, 109,898 high-  
378 confidence InDels were retained with missing rate less than 0.01 and MAF  $\geq 0.05$  within  
379 2,556 rice accessions. Among the 109,898 high-confidence InDels, we further identified 62  
380 subpopulation-specific InDels which can be used as barcodeInDels to differentiate the six rice  
381 subpopulation *TeJ*, *TrJ*, *Aro*, *Aus*, *Ind* and *Oru*, and the six subgroups of *indica* rice *SI-S6*  
382 (**Table S3**). The 109,898 high-confidence InDels can be download from SR4R for users'  
383 customized analysis.

384

### 385 **Web interface of SR4R database**

386 Using unified bioinformatics pipelines, the genotype data of the 18 million raw SNPs  
387 identified from 5,152 rice accessions were processed to construct four reference panels of  
388 SNPs for different utilizations. Because genotype data processing is a complicated and  
389 computationally intensive procedure, the four SNP panels are readily usable for a variety of  
390 analyses simplify task for rice researchers. For better sharing of SNPs and improvement of  
391 the rice variation map utility, we developed the SnpReady for Rice (SR4R) database.  
392 Through the SR4R web interface, users may directly browse the four panels and retrieve  
393 detailed information related to the 2,097,405 hapmapSNPs, 125,502 tagSNPs, 1,180  
394 fixedSNPs, 38 barcodeSNPs. In addition, the protein-coding genes exhibiting strong selection  
395 signatures, associated with the 1,180 fixedSNPs were also included in the SR4R database  
396 with detailed functional annotations (**Figure 7A**). When users retrieve a SNP such as the first  
397 SNP “OSA01S00001362”, the genomic location and the adjacent gene or the gene containing  
398 the queried SNP are displayed. Users may also retrieve a visualized allele frequency map in  
399 the six major subpopulations, and the six subgroups of *indica* rice (**Figure 7B**).

400 The users may also download the four panels of SNPs along with the original genotype  
401 files for local analysis via <http://sr4r.ic4r.org/download>. In addition, the “Tools” module  
402 presents 18 handy scripts and pipelines that users may install on their local computers for a  
403 variety of analysis, including basic genotype processing, population diversity analysis, rice  
404 variety identification and subpopulation classification. For example, assuming one user may  
405 want to perform a genotype imputation of 44K SNP rice Chip, she or he may first download  
406 the file “hapmapSNPs-genotype.tar.gz (892 MB)” containing the genotypes of the 2,097,405  
407 hapmapSNPs in 2,516 rice accessions. Then, the user may use the pipeline and scripts  
408 demonstrated in **Figure 7C** to perform imputation on a local server. SR4R also offers two  
409 modules of online analysis. The first module is to use a machine learning-based method to  
410 assign the subpopulation type based on the user-submitted genotype file including no more  
411 than 20 samples. The model will return the probability of the type of subpopulation assigned  
412 to each sample (**Figure 7D**). The second module is to perform DNA fingerprint analysis.  
413 When the user submits a genotype file containing no more than 20 samples, the model will  
414 search the accession database, and return the top three matches of existing varieties with the  
415 number of mismatched nucleotide and heterozygosity rate displayed (**Figure 7E**). The  
416 programs and scripts for these two modules along with demo input and output files are also  
417 available to download for local analysis of genotypes with large sample numbers.

## 419 **Conclusions**

420 The IC4R Rice Variation Database collects over 18 million raw SNPs identified from  
421 resequencing of 5,152 accessions. To meet the different demands for the rice research  
422 community and breeding industry, we further generated four panels of 2,097,405  
423 hapmapSNPs, 156,502 tagSNPs, 1,180 fixedSNPs and 38 barcodeSNPs with standard  
424 processing pipelines and uniform analytical parameters (**Table S2**). The four panels of SNPs  
425 can be either accessed online or downloaded for local use from the daughter database of RVD  
426 – SnpReady for rice (SR4R). The hapmapSNP panel contains 2 million non-missing  
427 genotypes of 2,556 accessions offers a reference HapMap for genotype imputation and high-  
428 resolution GWAS analysis. The non-redundant 150K tagSNP panel is an ideal magnitude for  
429 population genetics and evolutionary analysis for research, as well as an ideal marker pool for  
430 genomic selection-assisted breeding in rice. For a breeding population with about 500 F<sub>1</sub>  
431 hybrids, 1,500 to 15,000 markers selected from the tagSNP panel can be used to build a GS  
432 model, reaching a satisfactory genotype-to-phenotype prediction accuracy. The fixedSNP  
433 panel with high effectiveness and stability can be regarded as a marker pool for various  
434 molecular breeding practice suitable for low-budget, flexible genotyping platform, in terms of  
435 subpopulation classification, seed purity analysis and genetic background analysis. The 38  
436 barcodeSNPs selected by MinimalMarker algorithm is an initial marker set for generating  
437 DNA fingerprints for commercial rice varieties. Along with the barcodeSNP panel, two web-  
438 based tools, one for variety identification and another for subpopulation classification, are  
439 offered in SR4R. In addition, the SR4R database also offers a series of standard pipelines  
440 used to construct the four sets of SNPs, and local handy tools to perform rice varieties  
441 classification, barcode development, and other types of genetic and breeding research. With  
442 the incremental accumulation of population genotype data in BIGD center, these  
443 bioinformatics tools can be applied to other animal or plant species such as corn, wheat,  
444 soybeans, for a centralized reference HapMap and SNP panel databases for plants.

445

## 446 **Materials and Methods**

### 447 **Construction of hapmapSNP and tagSNP panels**

448 The raw 18 million SNPs with genotype information of 5,152 rice accessions were obtained  
449 from the IC4R rice variation database (<http://variation.ic4r.org>). Accession filtration, SNP

450 filtration and basic statistics of homozygous SNPs and accession heterozygosity were  
451 performed using in-house scripts. Genotype imputation of missing sites and phasing were  
452 performed using Beagle [8]. A SNP site with missing genotype was removed if an inferred  
453 genotype with a posterior probability was smaller than 0.5. Genomic annotation of  
454 hapmapSNPs was performed using ANNOVAR (version 20160201) against the rice  
455 International Rice Genome Sequencing Project (IRGSP) gene annotation. Using the reported  
456 LD length of rice ranging from 40 to 500 Kb, an LD-based SNP pruning method was used to  
457 construct the tagSNPs category using PLINK with *-indep* command [15] [16]. The PLINK  
458 parameters were selected based on the variance inflation factor (VIF), which recursively  
459 removed SNPs within a sliding window of 50 SNPs and a step size of 5 SNPs to shift the  
460 window.

461

#### 462 **Tools for subpopulation structure analysis**

463 The tagSNPs for 2,556 rice accessions were concatenated as input sequences for constructing  
464 the phylogenetic tree using the neighbour joining algorithm implemented in MegaCC with  
465 pairwise gap deletion and 100 bootstrap replications [17]. The output tree file for all 2,556  
466 rice accessions and the subtree file of *indica* rice accessions were visualized in MEGA7 [18].  
467 Principal component analysis of the 2,556 rice accessions was done by flashPCA [9].  
468 Population admixture structure analysis was done by fastSTRUCTURE using the variational  
469 bayesian framework, and  $k=2$  to  $k=8$  were set to infer the admixture of ancestors for the  
470 accessions.

471

#### 472 **Tools for genetic diversity analysis**

473 Genetic diversity related analyses were mostly done using PLINK [16]. Genome-wide  
474 pairwise IBS calculations were performed between each pair of accessions within the same  
475 subpopulation in order to deduce the genetic affinity, and an IBS pairwise distance matrix  
476 was generated for each subpopulation. The ROH analysis for each subpopulation used a  
477 sliding window method to scan each accession's genotype for a given population at each  
478 marker position to detect homozygous segments. The parameters and thresholds applied to  
479 define ROH were set as follows: a minimum ROH length of 200 Kbp and a minimum number  
480 of 1,000 consecutive SNPs included in an ROH. Correlation coefficient ( $r^2$ ) of SNPs was



481 calculated to measure LD level for each subpopulation. The average  $r^2$  value was calculated  
482 for each length of distance from 0 to 500 Kbp, followed by drawing LD decay figures using  
483 an R script for each subpopulation. Population diversity of rice varieties was measured by  
484 two indexes:  $\theta\pi$  and  $Fst$ . Nucleotide diversity  $\theta\pi$  was used as a measurement of the degree of  
485 genotype variability within each subpopulation, while subpopulation differentiations were  
486 evaluated by the fixation index  $Fst$  for each of the cultivated subpopulations against the wild  
487 rice population and for the cultivated subpopulations compared to each other. Values of  $\theta\pi$   
488 and  $Fst$  were calculated using sites mode implemented in VCFtools [19].

489

#### 490 **Tools for genomic selection analysis**

491 Genotype and phenotype datasets of the 44k rice chip were downloaded from the Rice  
492 Diversity Website (<http://www.ricediversity.org/>). Genotype imputation and phasing were  
493 then performed using Beagle (version 3.3.2), and the site was filtered if an inferred genotype  
494 with a posterior probability was smaller than 0.5. Genomic selection analysis was performed  
495 using RR-BLUP mixed model implemented in R package rrBLUP [13] for nine well-  
496 measured traits (flowering time, panicle fertility, seed width, seed volume, seed surface area,  
497 plant height, flag leaf length, flag leaf width, and florets per panicle) with five different  
498 feature combinations. The prediction accuracy under each feature combination was evaluated  
499 by five-fold cross-validation and Pearson correlation coefficient. An example of the process  
500 is as follows: the original samples were randomly partitioned into five subsets; of the five  
501 subsets, a single subset was retained as the validation data, and the remaining four subsets  
502 were used as training data. This process was repeated five times, with each of the ten subsets  
503 used exactly once as the validation data. The Pearson correlation coefficients of the predicted  
504 breeding values and the real phenotype values were calculated for each fold.

505

#### 506 **Construction of the fixedSNP panel**

507  $\theta\pi$  and  $Tajima'$  D values were calculated for six rice subpopulations (*TeJ*, *TrJ*, *aro*, *aus*, *ind*,  
508 *Oru*) with a sliding-window fashion across the genome using in-house scripts.  $Fst$  values  
509 were calculated for the five cultivated subpopulations against the wild *Oru* subpopulation, as  
510 well as for the five cultivated subpopulations against each other. For each pairwise  
511 comparison, the intersection of the top 5% windowed  $\theta\pi$  ratios (wild subpopulation vs.

512 cultivated subpopulation), and the top 5% windowed *Fst* values correspondingly were  
513 selected as strong selective sweep signals. Window sizes of both 100 Kbp and 10 Kbp were  
514 used to detect large or small selective sweep regions, followed by merging the results as the  
515 candidate selective sweep regions for each subpopulation. *Tajima*' D distribution was also  
516 drawn for the candidate selective sweep regions against the whole genomes for each pairwise  
517 comparison. Genes located within the candidate selective sweep regions were extracted for  
518 each comparison, and Gene Set Enrichment Analysis (GSEA) was performed for each gene  
519 listed by using PlantGSEA web tools [20]. Genic SNPs located in the candidate selective  
520 sweep regions identified from the above-mentioned pairwise comparisons were merged as  
521 fixedSNPs.

522

### 523 **Construction of the barcodeSNP panel**

524 The 1,180 fixedSNPs were used as the initial marker set to select the minimal number of  
525 barcodeSNPs that can maximally distinguish the 2,556 rice accessions using a heuristic mode  
526 implemented in MinimalMarker [7]. Three minimal sets each containing 28 SNPs were  
527 generated, and after merging the three sets, 38 unique SNPs were selected as barcodeSNPs  
528 for generating DNA fingerprints for each accessions.

529 To identify commercialized rice varieties using the combination of 38 barcodeSNPs, seven  
530 machine learning-based methods were used: decision tree, k-nearest neighboring, naïve  
531 Bayesian, artificial neural network, random forest, multinomial logistic regression, and one-  
532 vs-rest logistic regression algorithms in the Python sklearn library ([https://scikit-  
533 learn.org/stable/](https://scikit-learn.org/stable/)). The precision of each model was assessed using ten-fold cross-validation  
534 method. Specifically, the original sample set was randomly partitioned into ten subsets in  
535 which nine subsets were used for training model and the remaining subset was used as the  
536 testing model; this procedure was repeated ten times and an average prediction accuracy was  
537 computed from the overall performance of the tested models. Five one-hot codes (10000,  
538 01000, 00100, 00010, 00001) to label the five subpopulations for classification using  
539 machine learning models. Then, the predicted label with the max probability was compared  
540 with the original label for each sample. If the predicted label is identical with the original  
541 label, the prediction result was regarded as correct. Then, the ratios of positive and negative  
542 rate were computed to plot ROC curves and compute AUC values.

543

#### 544 **Construction of the barcodeInDel panel**

545 Raw InDels were identified using the IC4R variation calling pipeline from the origin 5,152  
546 rice accessions [2]. Then, the InDels from the 2,556 rice accessions with high sequencing  
547 coverage (depth  $\geq 5$ ) presented in SR4R database were extracted using customized Python  
548 scripts, followed by using VCFtools [19] to filter InDels to generate a high-confidence InDel  
549 dataset, with parameters of missing rate less than 0.01 and MAF  $\geq 0.05$ . Finally, using  
550 customized Python scripts, InDels which have the same sequence type within each  
551 subpopulation were retained to generate the subpopulation-specific barcodeInDel panel.

552

#### 553 **Data availability**

554 All the data is freely available and downloadable at <http://sr4r.ic4r.org/>.

555

#### 556 **Authors' contributions**

557 XFW, SHS and ZZ conceived the project; JY and CL collected the samples; JY conducted  
558 the data analysis; DZ developed the database; JY, XFW, SHS and ZZ wrote the manuscript.

559

#### 560 **Competing interests**

561 The authors declare no competing interests.

562

#### 563 **Acknowledgments**

564 We are grateful to a number of users for reporting bugs and providing suggestions in  
565 improving SR4R. This work was supported by the National Science Foundation of China  
566 [31871706], by the Department of Agriculture of Guangdong Province (2018-36), Science  
567 and technology program of Guangdong Province (2019B030316006) and by The Youth  
568 Innovation Promotion Association of the Chinese Academy of Sciences [2017141].

569

## 570 **References**

- 571 [1] Li Z, Fu BY, Gao YM, Wang WS, Xu JL, Zhang F, et al. The 3,000 rice genomes  
572 project. *GigaScience* 2014;3.
- 573 [2] Zhang Z, Hu S, He H, Zhang H, Chen F, Zhao W, et al. Information Commons for  
574 Rice (IC4R). *Nucleic Acids Research* 2016;44:D1172–80.
- 575 [3] Frazer KA, Ballinger DG, Cox DR, Hinds DA, Stuve LL, Gibbs RA, et al. A second  
576 generation human haplotype map of over 3.1 million SNPs. *Nature* 2007;449:851–61.
- 577 [4] Flint-Garcia SA, Thornsberry JM, Buckler ES. Structure of Linkage Disequilibrium in  
578 Plants. *Annual Review of Plant Biology* 2003;54:357–74.
- 579 [5] Nielsen R. Molecular Signatures of Natural Selection. *Annual Review of Genetics*  
580 2005;39:197–218.
- 581 [6] Lam HM, Xu X, Liu X, Chen W, Yang G, Wong FL, et al. Resequencing of 31 wild  
582 and cultivated soybean genomes identifies patterns of genetic diversity and selection.  
583 *Nature Genetics* 2010;42:1053–9.
- 584 [7] Fujii H, Ogata T, Shimada T, Endo T, Iketani H, Shimizu T, et al. Minimal marker: An  
585 algorithm and computer program for the identification of minimal sets of  
586 discriminating dna markers for efficient variety identification. *Journal of*  
587 *Bioinformatics and Computational Biology* 2013;11:1250022.
- 588 [8] Browning SR, Browning BL. Rapid and accurate haplotype phasing and missing-data  
589 inference for whole-genome association studies by use of localized haplotype  
590 clustering. *American Journal of Human Genetics* 2007;81:1084–97.
- 591 [9] Abraham G, Inouye M. Fast principal component analysis of large-scale genome-wide  
592 data. *PLoS ONE* 2014;9.
- 593 [10] Wang W, Mauleon R, Hu Z, Chebotarov D, Tai S, Wu Z, et al. Genomic variation in  
594 3,010 diverse accessions of Asian cultivated rice. *Nature* 2018;557:43–9.

- 595 [11] McCouch SR, Wright MH, Tung CW, Maron LG, McNally KL, Fitzgerald M, et al.  
596 Open access resources for genome-wide association mapping in rice. *Nature*  
597 *Communications* 2016;7.
- 598 [12] Spindel J, Begum H, Akdemir D, Virk P, Collard B, Redoña E, et al. Genomic  
599 Selection and Association Mapping in Rice (*Oryza sativa*): Effect of Trait Genetic  
600 Architecture, Training Population Composition, Marker Number and Statistical Model  
601 on Accuracy of Rice Genomic Selection in Elite, Tropical Rice Breeding Lines. *PLoS*  
602 *Genetics* 2015;11:1–25.
- 603 [13] Endelman JB. Ridge Regression and Other Kernels for Genomic Selection with R  
604 Package rrBLUP. *The Plant Genome Journal* 2011;4:250.
- 605 [14] Zhao K, Tung CW, Eizenga GC, Wright MH, Ali ML, Price AH, et al. Genome-wide  
606 association mapping reveals a rich genetic architecture of complex traits in *Oryza*  
607 *sativa*. *Nature Communications* 2011;2.
- 608 [15] Mather KA, Caicedo AL, Polato NR, Olsen KM, McCouch S, Purugganan MD. The  
609 extent of linkage disequilibrium in rice (*Oryza sativa* L.). *Genetics* 2007;177:2223–32.
- 610 [16] Chang CC, Chow CC, Tellier LCAM, Vattikuti S, Purcell SM, Lee JJ. Second-  
611 generation PLINK: Rising to the challenge of larger and richer datasets. *GigaScience*  
612 2015;4:7.
- 613 [17] Kumar S, Stecher G, Peterson D, Tamura K. MEGA-CC: Computing core of  
614 molecular evolutionary genetics analysis program for automated and iterative data  
615 analysis. *Bioinformatics* 2012;28:2685–6.
- 616 [18] Kumar S, Stecher G, Tamura K. MEGA7: Molecular Evolutionary Genetics Analysis  
617 Version 7.0 for Bigger Datasets. *Molecular Biology and Evolution* 2016;33:1870–4..
- 618 [19] Danecek P, Auton A, Abecasis G, Albers CA, Banks E, DePristo MA, et al. The  
619 variant call format and VCFtools. *Bioinformatics* 2011;27:2156–8.
- 620 [20] Yi X, Du Z, Su Z. PlantGSEA: a gene set enrichment analysis toolkit for plant  
621 community. *Nucleic Acids Research* 2013;41:W98-103.

## 623 **Figure legends**

### 624 **Figure 1 An overview of the four SNP panels of the SR4R database**

625 The flow chart describes procedures on how the four SNP panels were generated.

626

### 627 **Figure 2 Basic statistics of the rice hapmapSNPs after four steps of genotype processing**

628 After four steps of genotype processing, a series of basic statistical analyses was performed at  
629 each step to exhibit the characteristics of the SNPs, including: **A.** statistics of individual  
630 missing rate, **B.** statistics of individual heterozygote rate, **C.** statistics of minor allele  
631 frequency, **D.** statistics of site missing rate, and **E.** statistics of site heterozygote rate. **F.** After  
632 ARNOVAR analysis to annotated the hapmapSNPs, distribution of the hapmapSNPs in  
633 different genomic regions were analyzed.

634

### 635 **Figure 3 Population structure analysis of the 2,556 rice accessions using tagSNPs**

636 To test whether the 150K tagSNPs can generate the population structures consistent with  
637 previous reports, we performed a series of population structure analyses to generate: **A.** the  
638 phylogenetic tree, **B.** the PCA map, **C.** the admixture structure of 2,556 rice accessions, **D.**  
639 the phylogenetic tree of the six subgroups of *indica* rice. The tagSNPs effectively and  
640 accurately classified the 2,556 rice accessions to corresponding populations.

641

### 642 **Figure 4 Genetic diversity analysis of rice accessions using tagSNPs**

643 The 150K tagSNPs were used in a series of population genetic analysis to show the  
644 effectiveness of tagSNPs including: **A.** statistics of homozygous SNPs, **B.** statistics of  
645 individual heterozygosity, **C.** pairwise IBS values distribution, **D.** statistics of ROH regions,  
646 **E.** LD decay analysis, in the five major rice subpopulations. **F.** Genetic diversity ( $\theta\pi$ ) and  
647 population differentiation ( $F_{st}$ ) between cultivated and wild subpopulations. **G.** Population  
648 differentiation ( $F_{st}$ ) of cultivated subpopulations.

649

### 650 **Figure 5 Genomic selection-based phenotype prediction using tagSNPs**

651 Nine agronomical phenotypes were predicted based on rrBLUP models to evaluate the  
652 effectiveness of tagSNPs. Five sets of SNPs with equal amounts were compared, including  
653 Set-1: the original 29,434 SNPs on the 44K chip; Set-2: the 1,090 SNPs overlapped between  
654 the 156,502 tagSNPs and 29,434 SNPs; Set-3: the 1,090 SNPs randomly selected from the  
655 29,434 SNPs; Set-4: the 1,090 SNPs evenly distributed in the genome (350 Kb per SNP)

656 selected from the 29,434 SNPs; Set-5: 1,090 SNPs localized within a genomic region from  
657 the 29,434 SNPs.

658

### 659 **Figure 6 Screening and validation of FixedSNPs**

660 **A.** Distribution of  $\theta\pi$  ratios (wild vs cultivar) and corresponding *Fst* values, which are  
661 calculated in 100kb windows. Data points located to the right of the vertical dashed line and  
662 to the top of the horizontal dashed line are potential strong selective sweep signals (Red  
663 points, corresponding to the 5% right tails of the empirical  $\theta\pi$  ratio and *Fst* values distribution,  
664 respectively). Distribution of Tajima's D values for the potential selective sweep signals and  
665 whole genomes are shown within the plot. Other comparisons for the screening of subgroup  
666 specific selective sweep signals were not shown here, but demonstrate similar trends. **B.**  
667 Common and specific selective signals among cultivar subgroups (Number of genes or GSEA  
668 terms are shown out and in the brackets, respectively). **C.** Phylogenetic tree of 2,538 rice  
669 cultivars in fixedSNPs data set. **D.** Phylogenetic tree of 880 rice cultivars in 700K chip data  
670 set. **E.** Phylogenetic tree of 351 rice cultivars in 44K chip data set.

671

### 672 **Figure 7 Representative functional modules in SR4R database**

673 **A.** Genes exhibiting significant selection signatures in the corresponding subpopulations are  
674 listed in the "Selected Genes" module in the Browser. **B.** Allele frequencies in different  
675 subpopulations of the first hapmapSNP (SNPID: OSA01S00001362, associated gene:  
676 Os01g0100100, position: chr01-1362, allele: Alt-A, Ref-G). **C.** One example of the script and  
677 pipeline for population diversity analysis. **D.** The online analysis module of subpopulation  
678 classification using machine learning algorithms. **E.** The online analysis module of rice  
679 variety identification using the 38 barcodeSNPs.

680

### 681 **Supplementary material**

#### 682 **Figure S1 Population structure of 1,655 varieties in *indica***

683 **A.** PCA classification for 1,655 varieties in *indica* subgroup. **B.** Structure analysis for 1,655  
684 varieties in *indica* subgroup.

685

#### 686 **Figure S2 T-test for Pearson correlations of the selected 1,090 tagSNPs set and other 687 four SNP sets**

688 Set-1: the original 29,434 SNPs on the 44K chip; Set-2: the 1,090 SNPs overlapped between

689 the 156,502 tagSNPs and 29,434 SNPs; Set-3: the 1,090 SNPs randomly selected from the  
690 29,434 SNPs; Set-4: the 1,090 SNPs evenly distributed in the genome (350 Kb per SNP)  
691 selected from the 29,434 SNPs; Set-5: 1,090 SNPs localized within a genomic region from  
692 the 29,434 SNPs. Different colors present different P values. \* P value < 0.05; \*\* P value <  
693 0.01.

694

695 **Figure S3 BarcodeSNPs and machine learning models for the classification of rice**  
696 **varieties**

697 **A.** Heat-map of BarcodeSNPs of 2,538 rice cultivars (Red: A, Yellow: T, Blue: G, Green: C).  
698 **B.** Decision model. **C.** KNN model. **D.** Multinomial logistic regression model. **E.** Naive  
699 Bayesian model **F.** Neural network model. **G.** Random forest model. **H.** One-vs-rest logistic  
700 regression model. AUC curves were drawn using the mean values of ten cross validations for  
701 B-H.

702

703 **Figure S4 Independent validation of the machine learning model.**

704 **A.** ROC curve for the 770 Kb rice SNP chip dataset using the pre-build multinomial logistic  
705 regression model. **B.** The true positive rate (TPR) and false positive rate (FPR) statistics for  
706 each subpopulation of the 770 Kb rice SNP chip dataset.

707

708

709 **Table S1 Summary of 2,556 rice accessions with subpopulation classification and**  
710 **origins**

711

712 **Table S2 Summary of SNPs annotation for SR4R database**

713

714 **Table S3 The barcodeInDel panel in SR4R database**

715

716



717 **Figure 1**

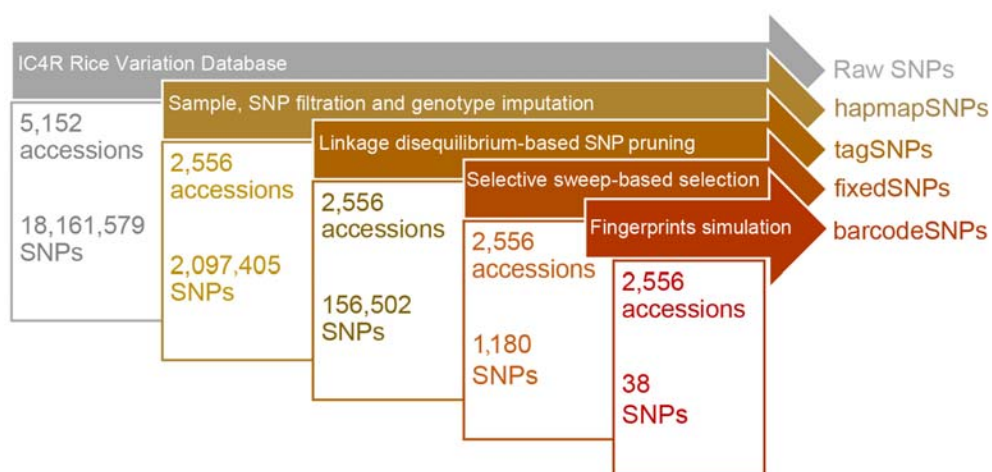

718

719

720

721

722

723

724 **Figure 2**

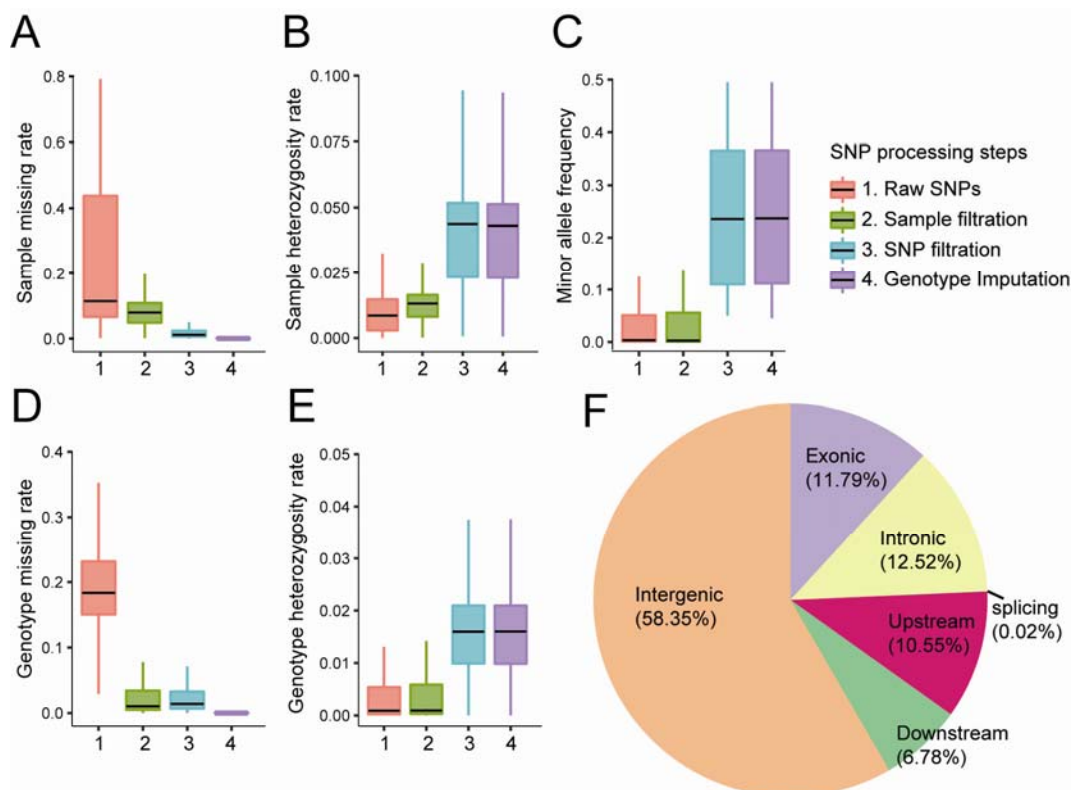

725

726

727 **Figure 3**

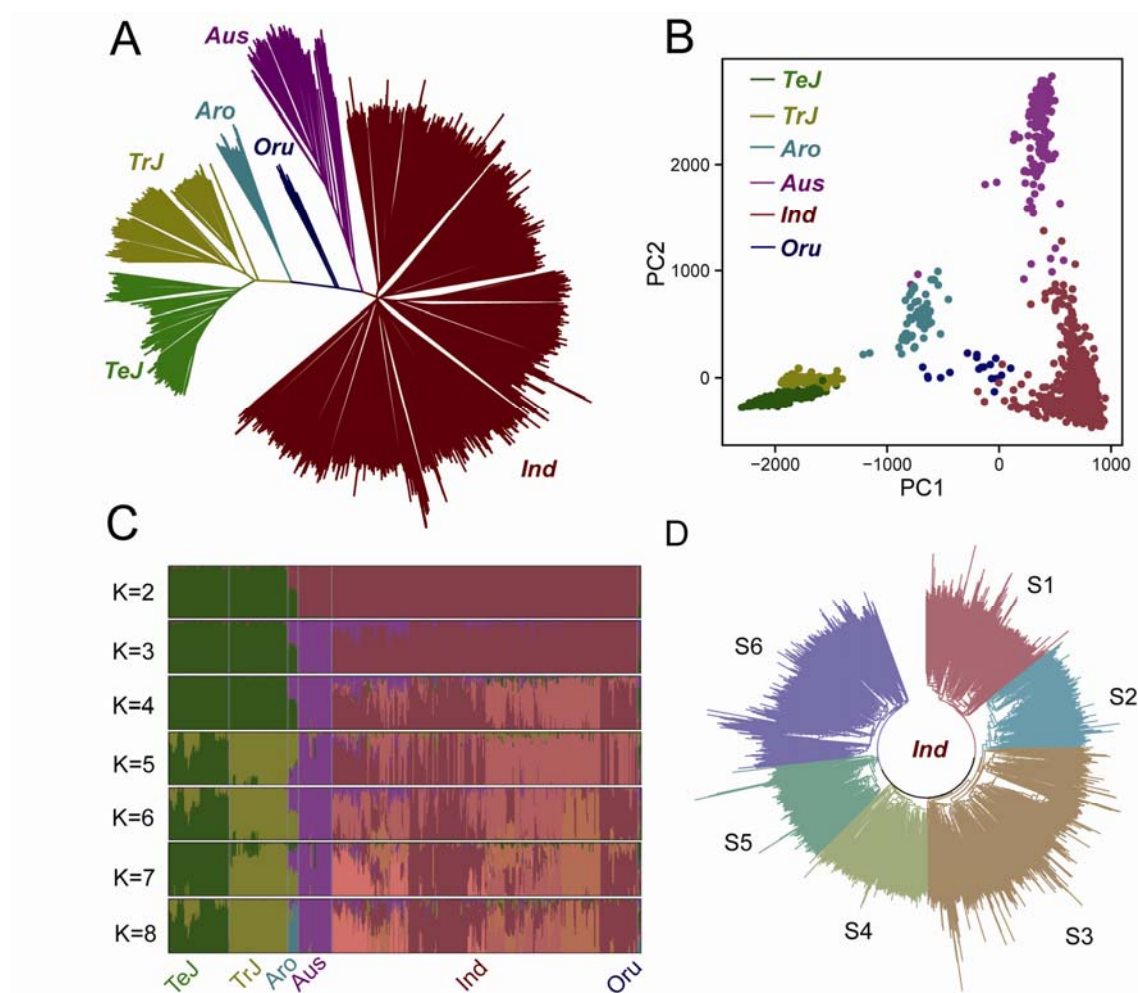

728

729

730

731

732

733

734

735

736

737

738

739

740

741

742 **Figure 4**

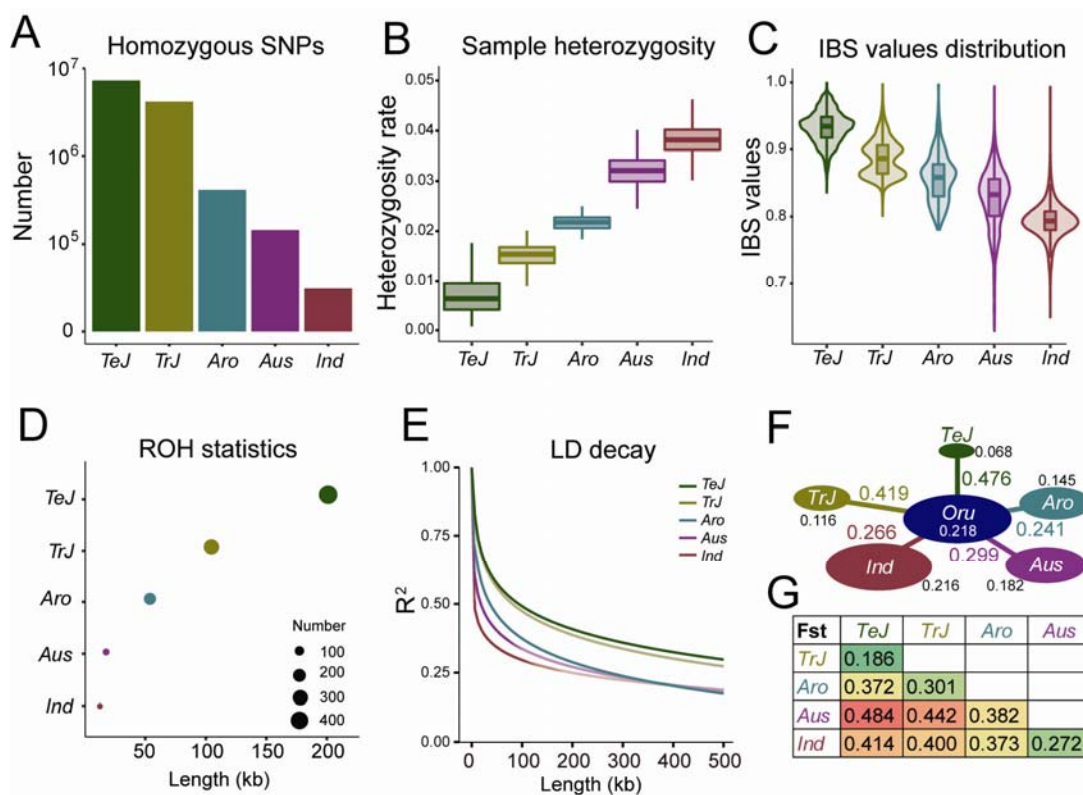

743

744

745

746

747

748

749

750

751

752

753

754

755

756

757

758

759

760 **Figure 5**

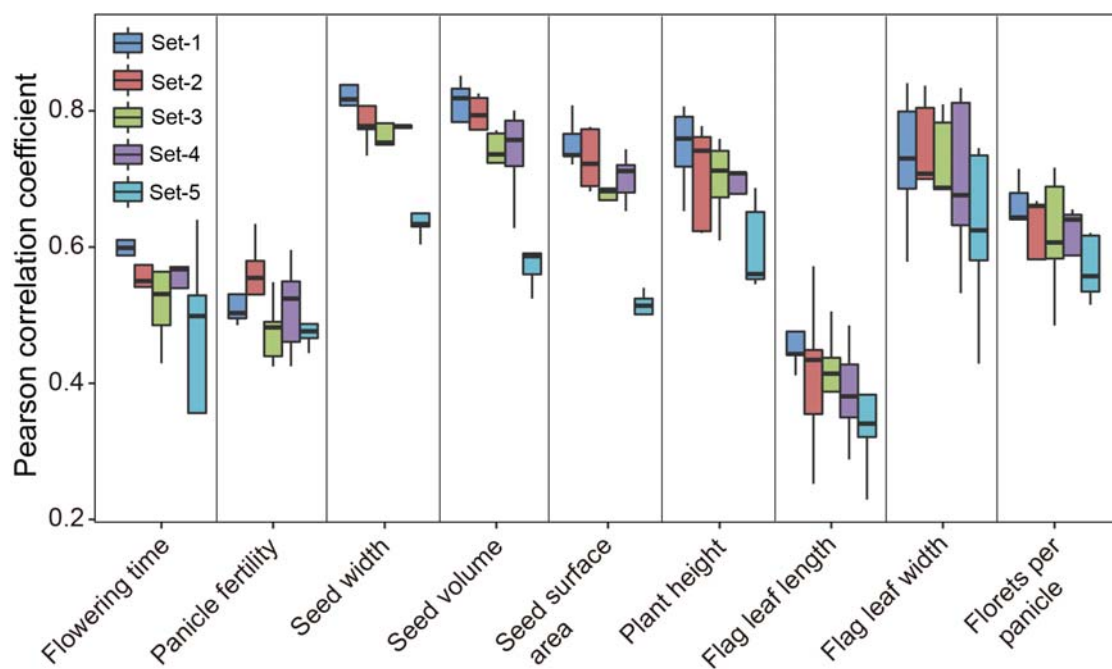

761

762

763

764

765

766

767

768

769

770

771

772

773

774

775

776

777

778

779

780

781 **Figure 6**

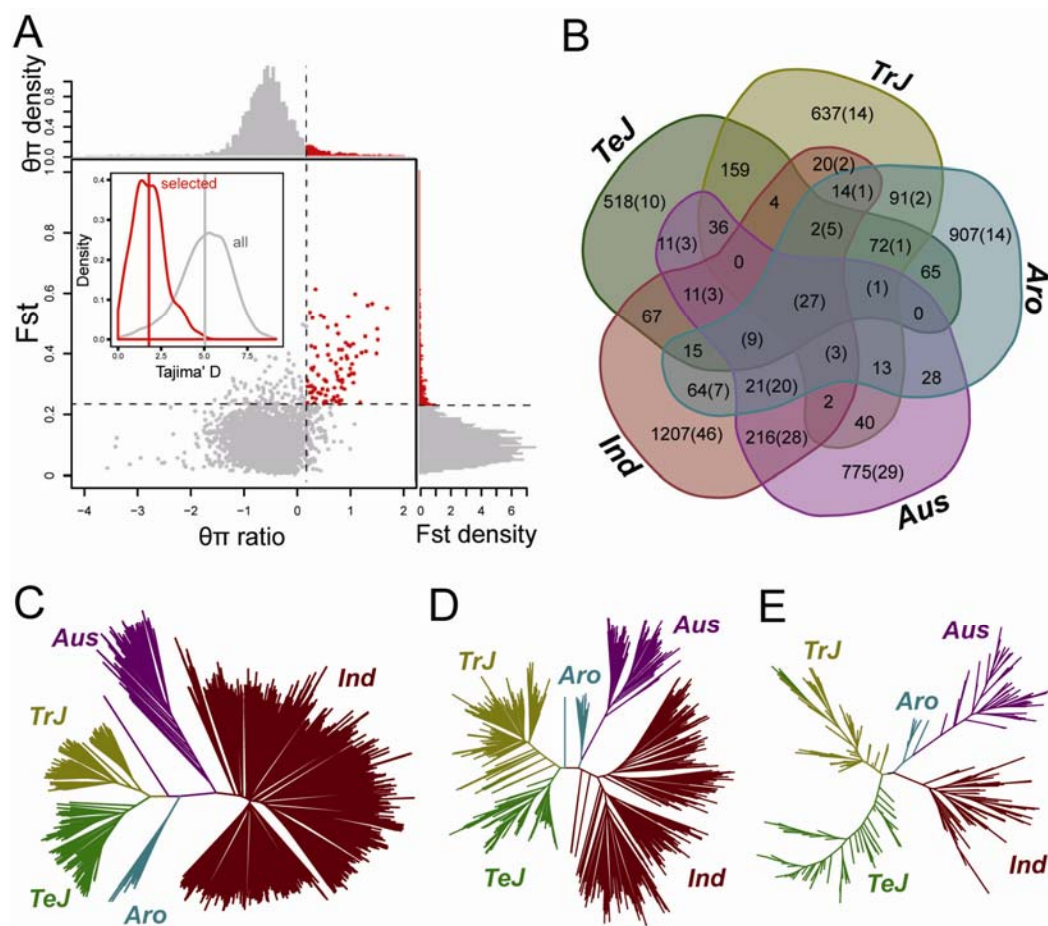

782

783

784

785

786

787

788

789

790

791

792

793

794

795

796

797 **Figure 7**

**A**

| Gene Accession | TeJ   | TrJ   | Aro   | Aus   | Ind   | All Cultivars | Description                                                                                            |
|----------------|-------|-------|-------|-------|-------|---------------|--------------------------------------------------------------------------------------------------------|
| Os01g0105700   | false | false | false | false | false | true          | Basic helix-loop-helix dimerisation region bHLH domain containing protein. (Os010105700-01)[OsbHLH071] |
| Os01g0105800   | false | false | false | false | false | true          | Similar to Iron sulfur assembly protein 1. (Os010105800-01)[ISC9; OsiSC9]                              |
| Os01g0121500   | false | false | false | false | false | true          | Conserved hypothetical protein. (Os010121500-01)                                                       |
| Os01g0127450   | false | false | false | false | false | true          | Similar to MYBL2 (ARABIDOPSIS MYB-LIKE 2); DNA binding / transcription factor. (Os010127450-00)        |
| Os01g0127500   | false | false | false | false | false | true          | NAD(P)-binding domain containing protein. (Os010127500-01)                                             |
| Os01g0127600   | false | false | false | false | false | true          | Similar to Bowman-Birk type proteinase inhibitor D-II precursor (IV). (Os010127600-01)                 |
| Os01g0129600   | false | false | false | false | false | true          | Similar to LBD40 (LOB DOMAIN-CONTAINING PROTEIN 40). (Os010129600-00)                                  |
| Os01g0134700   | false | false | false | false | true  | true          | Calmodulin binding protein-like family protein. (Os010134700-01)                                       |
| Os01g0134800   | false | false | false | false | true  | true          | Similar to (1,4)-beta-xylan endohydrolase, isoenzyme X-II (EC 3.2.1.8) (Fragment). (Os010134800-01)    |
| Os01g0134850   | false | false | false | false | true  | true          | Hypothetical protein. (Os010134850-00)                                                                 |

**B**

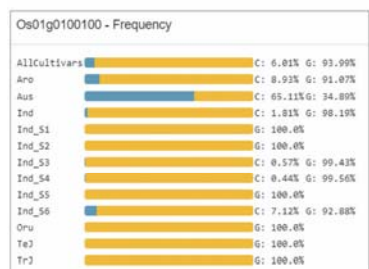

**C**

### Basic genotype processing

**Description:** Imputation of missing genotype and phasing for a provided hapmap file (Please performed on each chromosome separately).

**Usage:**

```
perl ../1.5_hapmap2beagle/hapmap2beagle.pl test7.hapmap > test7.be1
```

```
java -Xmx25180m -XX:MaxPermSize=25180m -jar beagle.jar phased-test7.be1 missing-R out=test7.be1
```

```
perl beaglephased2hapmap.pl test7.hapmap test7.be1.test7.be1.phased.gz test7.output.hapmap
```

**Input file:** test7.hapmap

**Output files:** test7.output.hapmap

**Parameters:** missing-R

**D**

### Machine Learning based Classification

Assign rice varieties to five groups based on 38 barcodeSNPs using machine learning models for a provided hapmap file.

Input file format:

```
chrChrom POS REF ALT B001 B002_1 B004_1 B006_1
```

Example file:

```
chr01 2640284 G A GG GA GA GA
```

chr01 3314033 T C TT TT TC TC

| Sample ID | Predicted Group | Probability (No.) | Probability (No.) | Probability (No.) | Probability (No.) | Probability (No.) |
|-----------|-----------------|-------------------|-------------------|-------------------|-------------------|-------------------|
| 8001      | TeJ             | 0.999             | 0                 | 0                 | 0                 | 0                 |
| 8002      | TeJ             | 0.999             | 0                 | 0                 | 0                 | 0                 |
| 8004      | TeJ             | 0.999             | 0                 | 0                 | 0                 | 0                 |
| 8006      | Ind             | 0                 | 0                 | 0                 | 0.004             | 0.994             |
| 8008      | Ind             | 0                 | 0                 | 0                 | 0                 | 0.999             |
| 8007      | TeJ             | 0.999             | 0                 | 0                 | 0                 | 0                 |
| 8009      | Ind             | 0                 | 0                 | 0                 | 0                 | 0.999             |
| 8009      | Ind             | 0                 | 0                 | 0                 | 0.002             | 0.997             |
| 8010      | Ind             | 0                 | 0.001             | 0.001             | 0.001             | 0.996             |

**E**

### Match and Identification

To match and identify rice varieties based on 38 barcodeSNPs for a provided hapmap file. The output is ordered by number of different sites (PDS) in the format of Accession Name (PDS)group:group1 - group2 (No. Cultivars).

Input file format:

```
chrChrom POS REF ALT B001 B002_1 B004_1 B006_1
```

Example file:

```
chr01 2640284 G A GG GA GA GA
```

chr01 3314033 T C TT TT TC TC

| ID     | Ref ID          | TeJ                  | Ind                          | TrJ                          |
|--------|-----------------|----------------------|------------------------------|------------------------------|
| 8001   | 016421020210789 | 00103_NG_China       | IR6_210-20362_NG_North_Korea | IR6_210-22262_NG_Japan       |
| 8002_1 | 016421020210789 | 00001_NG_China       | IR6_210-89903_NG_South_Korea | IR6_210-2264103_NG_Fiji      |
| 8004_1 | 021002011570474 | 00042_NG_Japan       | IR6_210-82263_NG_Japan       | IR6_210-2260003_NG_Russia    |
| 8006_1 | 020720720720727 | 00005_NG_Japan       | IR6_210-80914_NG_South_Korea | IR6_210-80914_NG_South_Korea |
| 8008   | 034210202107891 | 00006_Ind_31_Vietnam | CR843_Ind_31_Philippines     | IR6_210-1007614_Ind_31_India |
| 8007   | 034210202107891 | 00070_Ind_31_Vietnam | IR6_210-119813_Ind_30_India  | CR2293_Ind_33_Philippines    |
| 8009   | 010208101078477 | 00040_NG_Vietnam     | IR6_210-1                    | IR6_210-2260003_NG_Japan     |
| 8009   | 034210202107891 | 00090_Ind_32_Vietnam | IR6_210-154043_Ind_32_India  | IR6_210-1142634_Ind_31_India |
| 8010   | 034210202107891 | 00100_Ind_32_Vietnam | IR6_210-1142634_Ind_31_India | IR6_210-1142634_Ind_31_India |
| 8011   | 016421020210789 | 00110_Ind_30_India   | IR6_210-1115713_Ind_32_China | IR6_210-1115713_Ind_32_China |

798

799

800

801

802

803

804 **Figure S1**

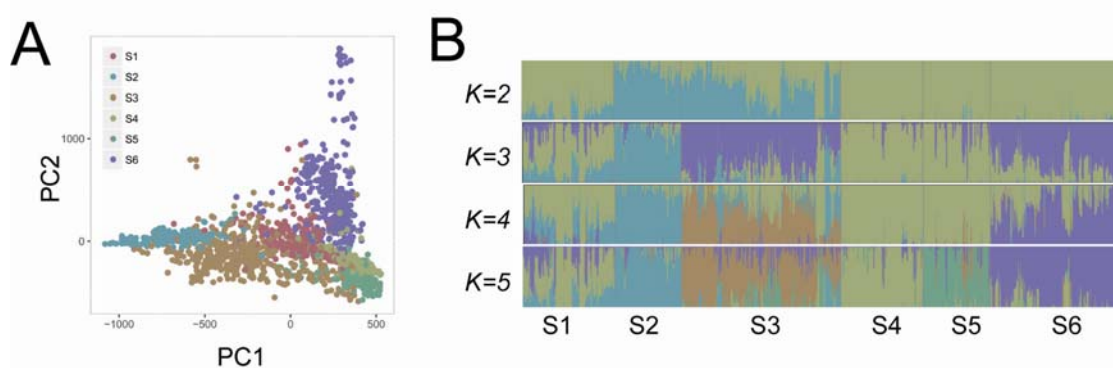

805

806

807

808

809

810

811 **Figure S2**

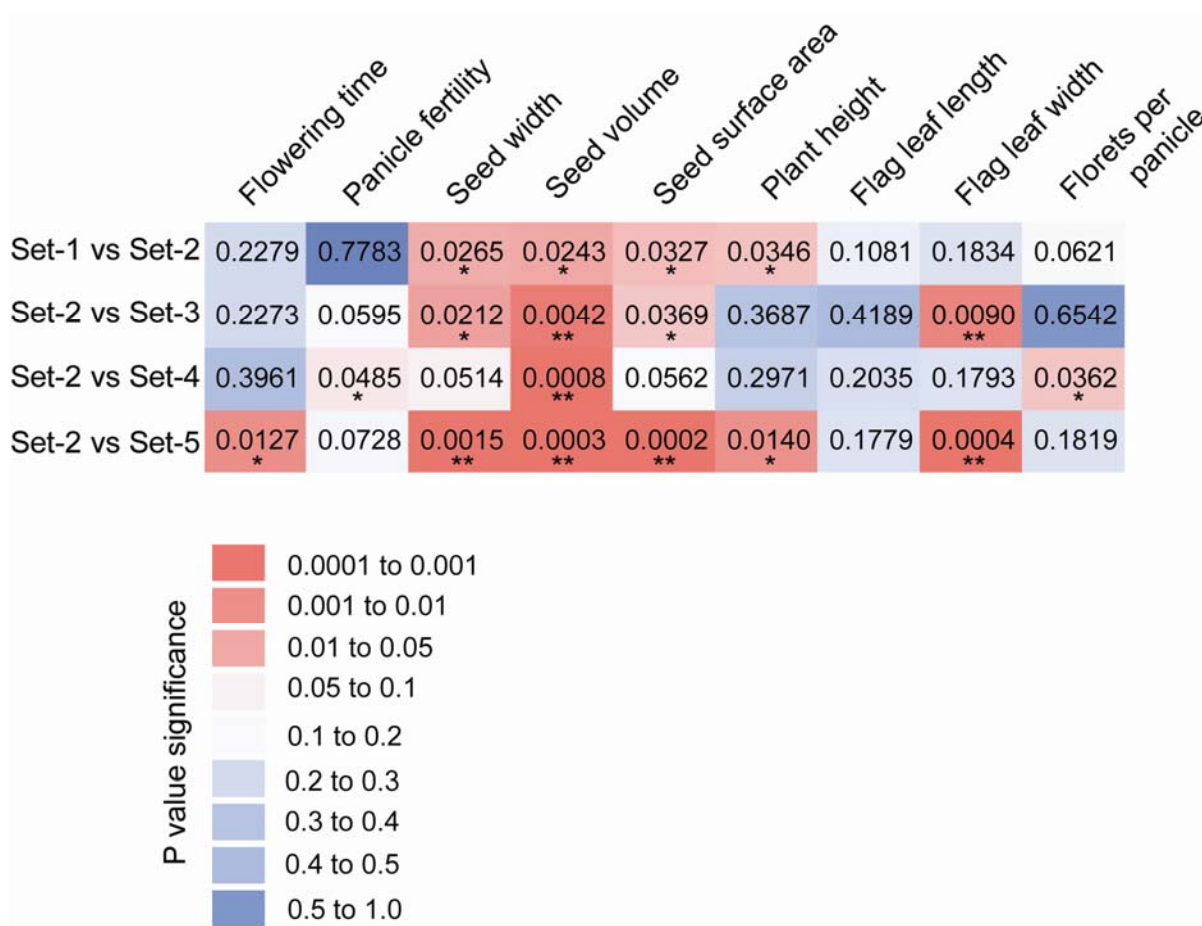

812

813

814 **Figure S3**

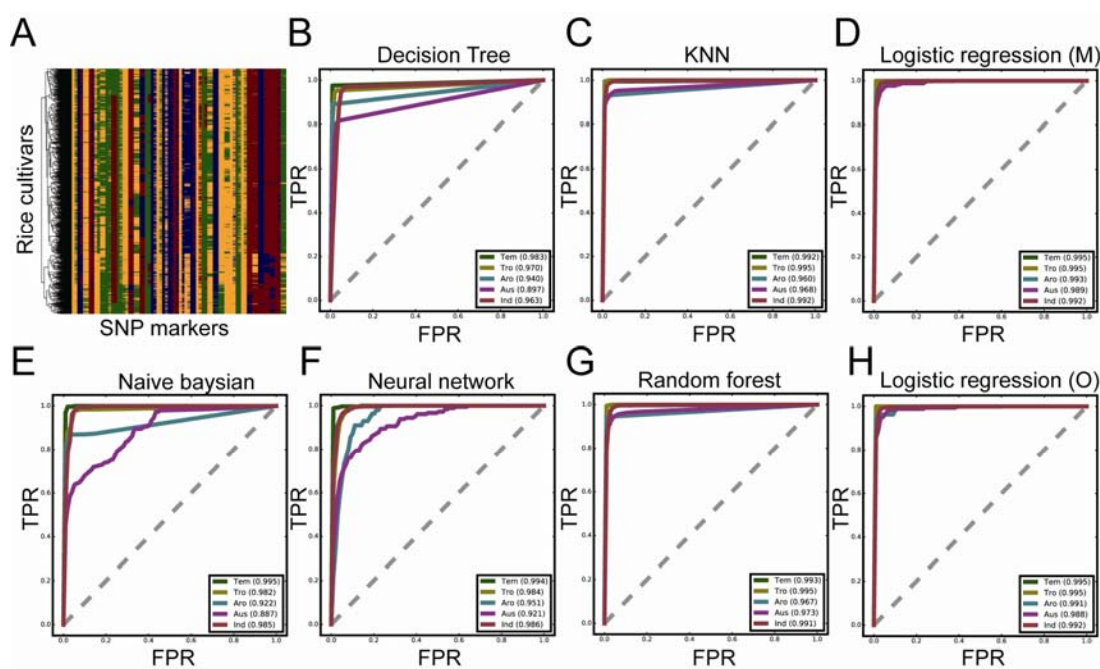

815

816

817

818 **Figure S4**

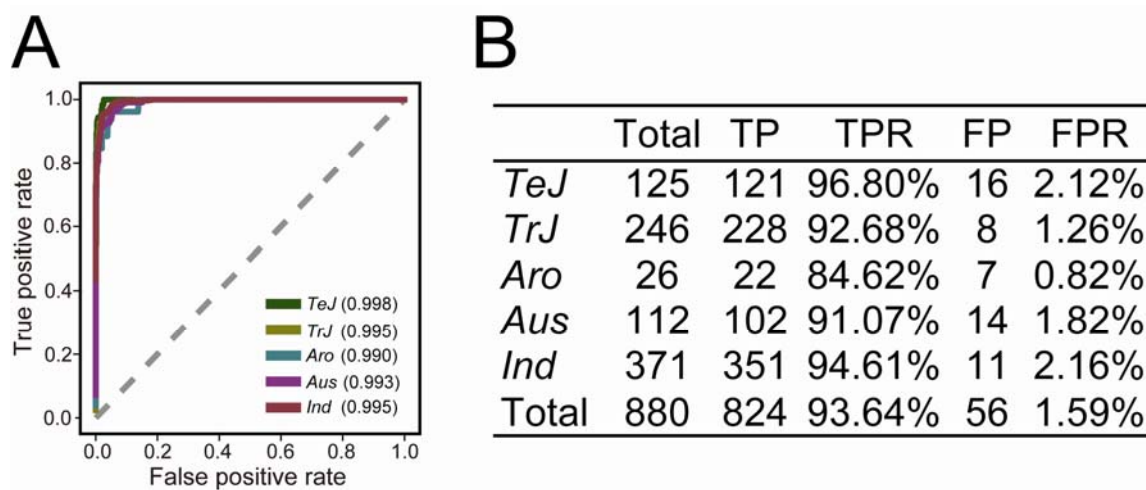

819
